# Supplementary material for: More massive but potentially less healthy: black vultures feeding in rubbish dumps differed in clinical and biochemical parameters with wild feeding birds
Source: PeerJ. 2018 Apr 19;6:e4645. doi: 10.7717/peerj.4645 (PMC5911382; doi:10.7717/peerj.4645)
Supplement: Supplemental Information 1 [file peerj-06-4645-s001.xlsx]

## Sheet: Hoja1
ident	Season	Age	Capture site	Body mass	Feather Cond	Hid	Haematocrit	Hemoglob	Gly	Urea	PA	AST	ALP	Uric acid	CPK	Calcium	Total Prot	Albumin	Globulins	A/G index
1	Autumn	Adult	Dump	2.27	Normal	Normal	55	18.7	318	9	129	36	58	6.8	1019	10.2	4.05	1.8	2.25	0.8
2	Autumn	Adult	Dump	2.04	Normal	Normal	56	18.9	395	9	74	29	42	3.45	1854	9.9	3.7	1.7	2	0.85
3	Autumn	Adult	Dump	2.58	Normal	Normal	54	17.2	327	6.5	176	129	65	NA	4665	8.8	3.6	1.6	2	0.8
4	Autumn	Adult	Dump	2.4	Normal	Normal	57	18	363	5	83	47	52	3.9	2268	9.9	3.7	1.6	2.1	0.761905
5	Autumn	Adult	Dump	2.2	Normal	Normal	54	17.4	409	4	132	42	50	4.5	2573	9.7	3.6	1.65	1.95	0.846154
6	Autumn	Adult	Dump	2.11	Normal	Normal	53	17.4	336	4	63	142	50	5.4	7479	9.4	3.35	1.55	1.8	0.861111
7	Autumn	Adult	Dump	2.09	Normal	Normal	56	18.1	439	4	89	62	90	4.3	5450	8.9	4	1.85	2.15	0.860465
8	Autumn	Adult	Dump	2.06	Normal	Normal	44	16.9	358	5	56	134	39	4.4	NA	8.7	3.3	1.55	1.75	0.885714
9	Autumn	Adult	Dump	2.43	Normal	Normal	56	17.7	304	7	63	318	121	7.9	27432	9.2	3.8	1.7	2.1	0.809524
10	Autumn	Adult	Dump	2.34	Normal	Normal	58	17.9	337	4	38	47	54	8.8	1018	9	3.6	1.7	1.9	0.894737
11	Autumn	Adult	Dump	2.36	Normal	Normal	54	17.1	339	4	97	42	47	4.7	1070	9.3	3.75	1.7	2.05	0.829268
12	Autumn	Adult	Dump	1.86	Normal	Normal	57	17.7	378	5	72	37	41	4.8	1325	9.2	3.7	1.7	2	0.85
13	Autumn	Adult	Dump	2.12	Normal	Normal	NA	NA	346	5	209	94	44	8.45	5940	10.8	3.2	1.4	1.8	0.777778
14	Autumn	Adult	Dump	1.92	Normal	Normal	60	18.6	315	5	198	81	66	6.9	3740	10.2	4.4	1.9	2.5	0.76
15	Autumn	Adult	Dump	2.35	Normal	Normal	50	16.8	392	7	38	56	93	11.8	1261	9.3	3.35	1.5	1.85	0.810811
16	Autumn	Adult	Dump	2.47	Normal	Normal	58	17.9	306	6	61	53	76	6.4	2679	9.5	4.4	2.1	2.3	0.913043
17	Autumn	Adult	Dump	2.26	Normal	Normal	56	18.8	374	4	40	62	38	4.7	1398	9	3.15	1.45	1.7	0.852941
18	Autumn	Adult	Dump	2.01	Normal	Normal	61	18.9	459	5	49	256	57	6.3	16053	8.9	3.75	1.55	2.2	0.704545
19	Spring	Adult	Dump	2.37	Normal	Normal	48	16.3	402	4.5	62	35	57	9.3	1142	9.2	3.15	1.25	1.9	0.657895
20	Spring	Adult	Dump	2.31	Normal	Normal	55	17.7	348	5.7	122	35	36	4.55	984	9	4	1.5	2.5	0.6
21	Spring	Adult	Dump	2.22	Normal	Normal	56	17.9	321	3.5	51	33	56	4.2	2160	8.5	3.25	1.35	1.9	0.710526
22	Spring	Adult	Dump	2.22	Normal	Normal	53	15.8	416	3	32	56	46	2.15	2215	8	3.5	1.3	2.2	0.590909
23	Spring	Adult	Dump	1.84	Normal	Normal	50	16.3	236	16	40	56	62	7.6	1838	8.2	4.1	1.4	2.7	0.518519
24	Spring	Adult	Dump	2.13	Normal	Normal	49	16.6	402	4.5	46	45	40	7.05	1319	8.5	3.35	1.36	1.99	0.683417
25	Spring	Adult	Dump	2.09	Normal	Normal	45	15.4	311	16	141	42	17	5.4	1122	10	3.3	1.4	1.9	0.736842
26	Spring	Adult	Dump	2.11	Normal	Normal	52	17.5	433	12	53	73	86	8.9	1040	10	5.4	1.9	3.5	0.542857
27	Spring	Adult	Dump	2.29	Normal	Normal	55	17.4	424	10	18	64	56	4.6	1184	11.6	5	1.95	3.05	0.639344
28	Spring	Adult	Dump	2.34	Normal	Normal	54	17.3	329	6	54	131	73	4.9	2267	9.5	3.75	1.6	2.15	0.744186
29	Spring	Adult	Dump	2.14	Normal	Normal	51	17.4	389	8	35	55	68	6	2181	9.4	3.85	1.6	2.25	0.711111
30	Spring	Adult	Dump	2.14	Normal	Normal	55	17.6	342	8	64	207	104	4.75	2278	9.1	3.7	1.7	2	0.85
31	Spring	Adult	Dump	2.3	Normal	Normal	55	16.9	314	6	35	44	46	4.1	1701	9.46	3.95	1.6	2.35	0.680851
32	Spring	Adult	Dump	2.2	Normal	Normal	47	15.4	282	5	40	36	22	6.9	677	9	3.35	1.4	1.95	0.717949
33	Spring	Adult	Dump	2.18	Normal	Normal	51	16.6	276	5	78	30	26	7.45	466	10.3	3.6	1.55	2.05	0.756098
34	Spring	Adult	Dump	2.45	Normal	Normal	50	17.7	330	5	42	47	50	7.45	1060	9.2	3.3	1.4	1.9	0.736842
35	Autumn	Adult	Dump	2.17	Normal	Normal	61	19.5	327	6	55	35	77	13.9	1685	10.1	4.8	1.85	2.95	0.627119
36	Autumn	Adult	Dump	2.63	Normal	Normal	58	18.8	300	6	52	50	94	7.85	1863	9.85	3.85	1.55	2.3	0.673913
37	Autumn	Adult	Dump	2.37	Normal	Normal	57	18.4	313	5	66	43	52	11.3	1997	10.2	3.75	1.45	2.3	0.630435
38	Autumn	Adult	Dump	2.11	Normal	Normal	54	17.7	443	6	58	446	59	10.1	1327	10.7	5.45	1.7	3.75	0.453333
39	Autumn	Adult	Dump	2.54	Normal	Normal	53	17.5	286	5	67	79	52	5.1	2059	9.25	3.4	1.4	2	0.7
40	Autumn	Adult	Dump	2.15	Normal	Normal	58	19	312	6	80	50	37	6.85	2045	9.25	4.25	1.75	2.5	0.7
41	Autumn	Adult	Dump	2.33	Normal	Normal	50	16.6	392	7	30	54	56	5.3	2552	8.9	3.55	1.45	2.1	0.690476
42	Autumn	Adult	Dump	2.69	Abnormal	Normal	58	18.1	369	7	43	55	90	12	1756	11.5	5.8	1.9	3.9	0.487179
43	Autumn	Adult	Dump	2.32	Normal	Normal	55	18.3	368	4	72	81	60	4.8	3124	8.65	3.7	1.5	2.2	0.681818
44	Autumn	Adult	Dump	2.28	Normal	Normal	50	16.7	373	4	97	30	35	4.75	542	9.7	3.65	1.5	2.15	0.697674
45	Autumn	Adult	Dump	2.33	Abnormal	Normal	52	16.9	393	3	57	39	56	4.25	1209	8.65	3.85	1.6	2.25	0.711111
46	Autumn	Adult	Dump	2.24	Abnormal	Normal	57	19.1	313	4	67	27	73	6	1617	8.9	3.75	1.6	2.15	0.744186
47	Autumn	Adult	Dump	2.47	Normal	Normal	55	17.8	338	3	49	28	48	5.6	726	9.6	3.95	1.55	2.4	0.645833
48	Autumn	Adult	Dump	2.17	Normal	Normal	57	18.2	299	4	72	31	56	3.9	847	9.85	4.25	1.75	2.5	0.7
49	Spring	Adult	Steppe	2	Normal	Abnormal	53	14.9	198	5	58	118	46	4.25	6430	10.6	4.95	1.8	3.15	0.571429
50	Spring	Adult	Steppe	2.3	Normal	Normal	59	16.2	274	7	65	88	62	5.8	4487	8.9	3.75	1.6	2.15	0.744186
51	Spring	Adult	Steppe	2.1	Normal	Normal	54	15.7	209	9	38	303	161	5.3	15714	9.1	3.6	1.5	2.1	0.714286
52	Spring	Adult	Steppe	2.16	Normal	Normal	62	16.7	250	5	56	51	76	4.7	2917	9.6	4.4	1.65	2.75	0.6
53	Spring	Adult	Steppe	2.29	Normal	Normal	55	16	262	12	20	121	97	8	5573	8.9	3.1	1.25	1.85	0.675676
54	Spring	Adult	Steppe	2.05	Normal	Normal	52	15.6	275	6	45	155	69	5.75	13650	8.7	3	1.25	1.75	0.714286
55	Spring	Adult	Steppe	2.01	Normal	Normal	52	15.7	264	5	20	60	56	4.5	2540	9.6	4.35	1.6	2.75	0.581818
56	Spring	Adult	Steppe	2.13	Normal	Normal	52	16.4	281	5	63	145	97	4.7	10052	8.9	3.3	1.4	1.9	0.736842
57	Spring	Adult	Steppe	2.07	Normal	Normal	39	13.5	253	5	163	210	73	5	11279	8.8	2.7	1.15	1.55	0.741935
58	Spring	Adult	Steppe	2.09	Normal	Normal	58	19.4	264	9	21	329	118	7.5	29810	9	3.35	1.25	2.1	0.595238
59	Spring	Adult	Steppe	2.15	Normal	Normal	52	17.7	242	6	33	74	38	4	5212	8.8	3.65	1.55	2.1	0.738095
60	Spring	Adult	Steppe	2.18	Normal	Normal	55	16.4	244	8	52	237	116	4.94	15263	8.9	3.6	1.45	2.15	0.674419
61	Spring	Adult	Steppe	2.18	Normal	Normal	59	17.4	201	6	33	219	99	4.85	11124	8	3	1.2	1.8	0.666667
62	Spring	Adult	Steppe	2.08	Normal	Normal	59	17.6	227	7	73	142	155	5.5	14049	8.8	3.8	1.6	2.2	0.727273
63	Spring	Adult	Steppe	2.32	Normal	Normal	59	17.7	253	6	20	299	126	5	18427	9.4	3.5	1.45	2.05	0.707317
64	Spring	Adult	Steppe	2.09	Normal	Normal	55	16.9	331	7	33	171	98	4.75	14890	8.5	3.4	1.4	2	0.7
65	Autumn	Adult	Steppe	2.2	Normal	Normal	57	18.8	353	3	96	40	24	3.4	1200	8.6	3.45	1.5	1.95	0.769231
66	Autumn	Adult	Steppe	2.21	Normal	Normal	52	17.5	212	3	33	294	134	8.3	19977	8.4	3.3	1.45	1.85	0.783784
67	Autumn	Adult	Steppe	2.28	Normal	Normal	60	19.1	317	4	33	42	68	2.4	1480	9.2	3.5	1.55	1.95	0.794872
68	Autumn	Adult	Steppe	2.45	Normal	Normal	46	14.9	291	7	76	99	66	8.6	4448	8.4	3.4	1.4	2	0.7
69	Autumn	Adult	Steppe	2.16	Normal	Normal	60	18.8	322	7	62	198	118	5.45	9878	9.4	3.6	1.6	2	0.8
70	Autumn	Adult	Steppe	2.24	Normal	Normal	56	18.7	406	6	34	115	54	3.25	5931	8.9	3.65	1.65	2	0.825
71	Autumn	Adult	Steppe	2.23	Normal	Normal	55	17.9	312	8	27	255	135	6	13485	9.1	3.85	1.65	2.2	0.75
72	Autumn	Adult	Steppe	2.47	Normal	Normal	55	18	243	6	52	302	136	4.9	16276	8.3	3.4	1.4	2	0.7
73	Autumn	Adult	Steppe	2.06	Normal	Normal	NA	NA	NA	NA	NA	NA	NA	NA	NA	NA	NA	NA	NA	NA
74	Autumn	Adult	Steppe	2.27	Normal	Normal	38.5	18.7	160	NA	100	118	47	NA	NA	NA	3.5	1.5	2	0.75
75	Autumn	Adult	Steppe	2.44	Normal	Normal	33	17.5	336	NA	56	113	60	NA	NA	NA	3.75	2	1.75	1.14286
76	Autumn	Adult	Steppe	2.28	Normal	Normal	35.7	18.4	206	NA	101	199	109	NA	NA	NA	3.95	0.8	3.15	0.253968
77	Autumn	Adult	Steppe	2.42	Normal	Normal	40	19.9	156	NA	107	471	159	NA	NA	NA	3.45	1.76	1.69	1.04142
78	Autumn	Adult	Steppe	2	Normal	Normal	33.9	18.7	131	10	181	112	70	3.25	10416	9.8	3.85	1.81	2.04	0.887255
79	Autumn	Adult	Steppe	2.13	Normal	Normal	NA	NA	NA	NA	NA	NA	NA	NA	NA	NA	NA	NA	NA	NA
80	Autumn	Adult	Steppe	1.93	Normal	Normal	38.5	19.8	128	11	19	96	73	4.65	6666	8.9	4.4	2.05	2.35	0.87234
81	Autumn	Adult	Steppe	2.24	Normal	Normal	40	20.23	252	11	41	91	34	5.4	2485	8.8	3.9	1.75	2.15	0.813953
82	Autumn	Adult	Steppe	2.32	Normal	Abnormal	30	15	133	14	54	146	66	14.4	10755	8.4	3.4	1.61	1.79	0.899441
83	Autumn	Adult	Steppe	2.03	Normal	Normal	34	17.7	237	7	29	141	34	6.86	6409	9.4	3.44	1.61	1.83	0.879781
84	Autumn	Adult	Steppe	2.05	Normal	Normal	35.7	18.7	269	10.7	40	124	85	7.28	4638	8.9	3.7	1.77	1.93	0.917098
85	Autumn	Adult	Steppe	1.99	Normal	Abnormal	33.6	17.2	273	7.8	149	61	41	3.37	3947	8.9	4.4	1.78	2.62	0.679389
86	Autumn	Adult	Steppe	2.54	Normal	Normal	40.8	20.9	268	10	39	201	81	6.65	10468	8.1	3.84	1.66	2.18	0.761468
87	Autumn	Adult	Steppe	2.24	Normal	Normal	35.2	17.4	299	8.7	34	117	66	4.55	8087	8.4	3.38	2.52	0.86	2.93023
88	Autumn	Adult	Steppe	2.11	Normal	Normal	37	18.7	445	9.3	78	81	58	3.48	3883	9.7	3.6	1.67	1.93	0.865285
89	Autumn	Adult	Steppe	2.24	Normal	Abnormal	38.5	19.1	296	5.7	36	105	69	2.46	4060	8.7	3.44	1.56	1.88	0.829787
90	Autumn	Adult	Steppe	1.94	Normal	Normal	32.4	17.1	237	6.6	44	166	57	4.34	11512	9.8	4.86	1.87	2.99	0.625418
91	Autumn	Adult	Steppe	2.14	Normal	Normal	37.7	20.1	163	4.4	35	198	127	4.59	15114	9.6	3.82	1.62	2.2	0.736364
92	Autumn	Adult	Steppe	2	Normal	Abnormal	42.4	20.2	256	4.6	33	121	66	3.54	6706	8.8	3.97	1.78	2.19	0.812785
93	Autumn	Adult	Steppe	2.17	Normal	Normal	42.6	22.5	190	5.3	121	298	81	6.24	NA	9	3.76	1.64	2.12	0.773585
94	Autumn	Adult	Steppe	2.23	Normal	Normal	34.1	16.9	278	6.7	55	97	66	2.13	3931	8.9	3.48	1.56	1.92	0.8125
